# Supplementary material
Source: Springer Nature journal article supplement (https://www.springermedizin.de/resource/supplementary/12936_2009_1167_MOESM4_ESM.pdf/9550036)
Supplement: MOESM4 [file 9550036]

Ethical and Regulatory approval of the intended clinical trial.

```
graph TD; A[Ethical and Regulatory approval of the intended clinical trial.] --> B[Administrative procedures: Local government structures such as Local District Health offices]; B --> C[Community Leaders are approached to initiate engagement with community]; C --> D[Direct Community Engagement facilitated by the community leaders]; D --> E[Public audiences with ordinary members of community including heads of families]; E --> F[Recruitment of individual participants];
```

Administrative procedures: Local government structures such as Local District Health offices

Community Leaders are approached to initiate engagement with community

Direct Community Engagement facilitated by the community leaders

Public audiences with ordinary members of community including heads of families

Recruitment of individual participants
